# Supplementary material
Source: PubMed Central journal article supplement (PMC2945882)

Type of file: figure

Label: Suppl Figs

Filename: nature04186-s1-s5.pdf

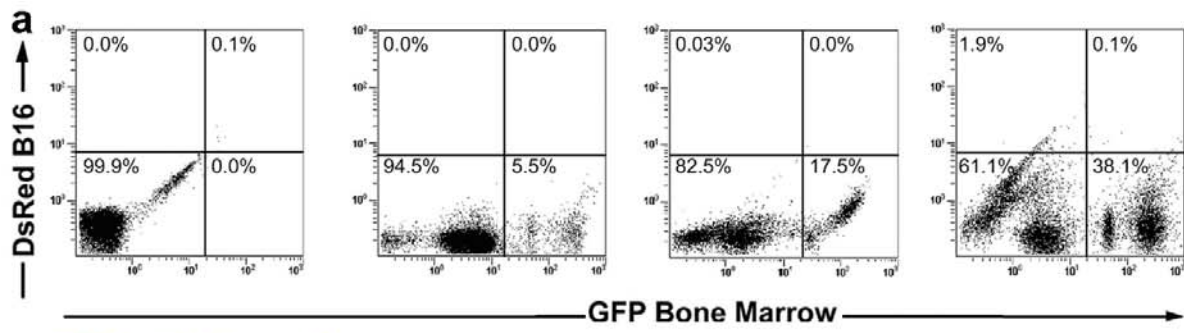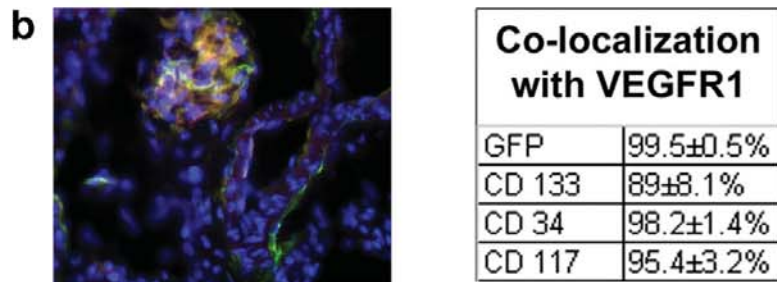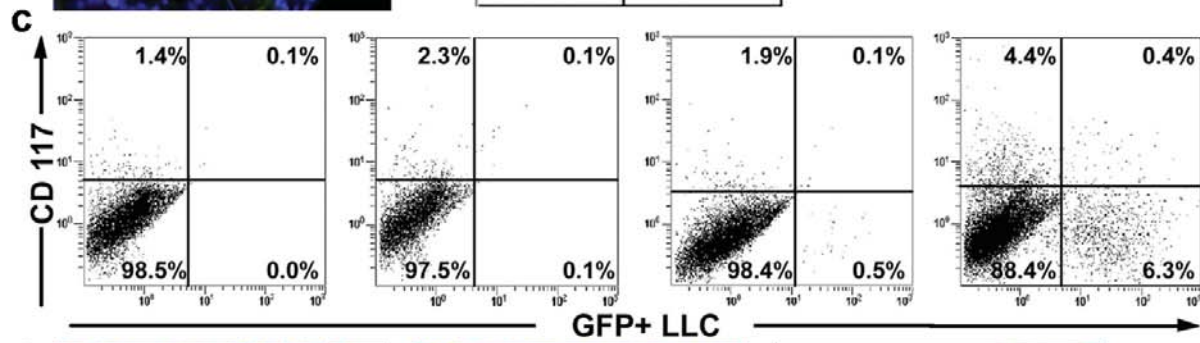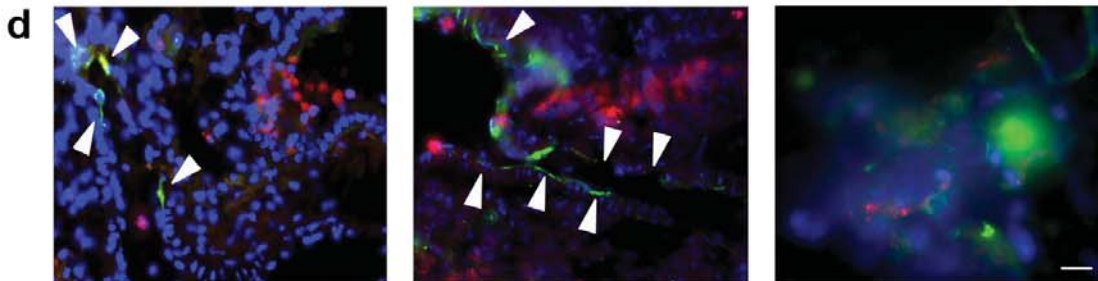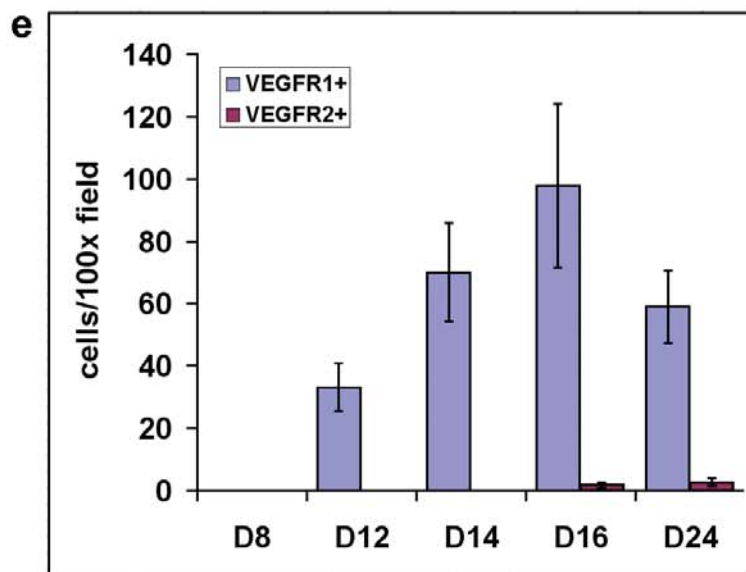

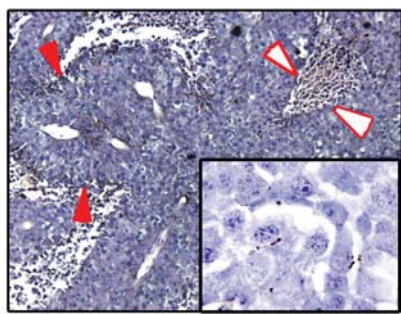

**WT**

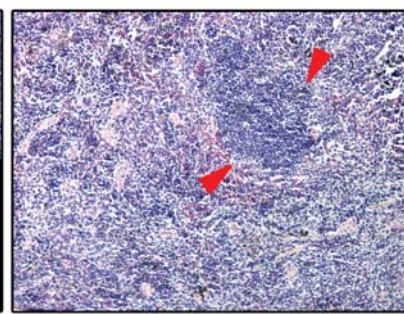

**anti-R1**

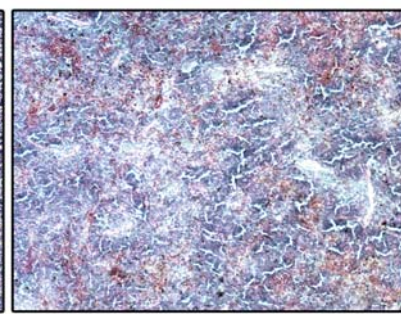

**anti-R2**

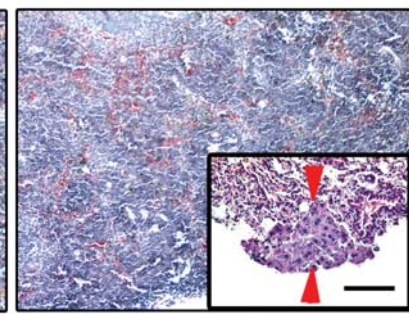

**anti-R1 + anti-R2**

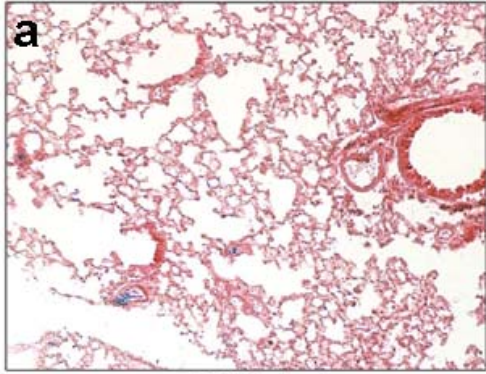

**a** anti-VLA-4

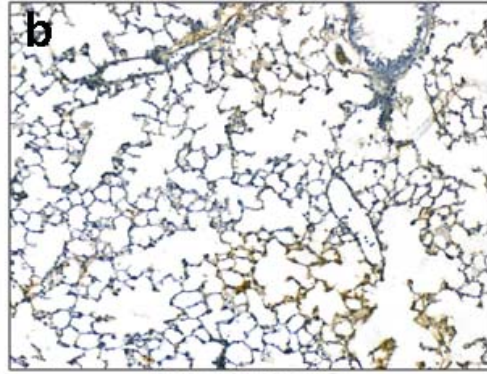

**b** MMP-9 KO

**c**

|            | Anti-VLA4 | IgG      | MMP-9 KO | Control  | Id3 -/- | Id3 -/- + VEGFR1 | Control |
|------------|-----------|----------|----------|----------|---------|------------------|---------|
| Clusters   | 2.6±0.4   | 25.4±3.0 | 12.3±1.8 | 35.2±1.9 | 1.1±0.3 | 63.7±4.5         | 48±3.6  |
| Metastasis | 0.4±0.2   | 5.5±0.6  | 0.6±0.3  | 10±1.1   | 0       | 6.5±1.1          | 6.1±1.5 |

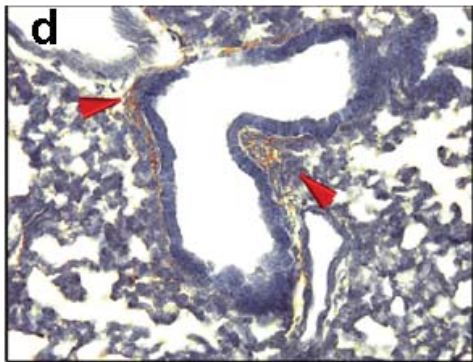

**d** Day 3

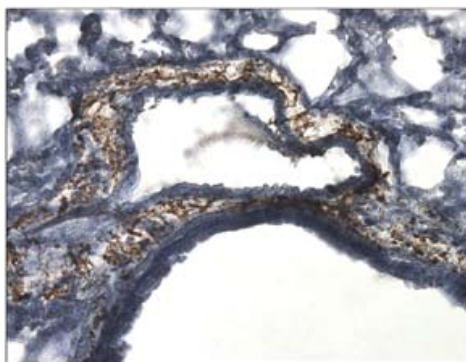

Day 14

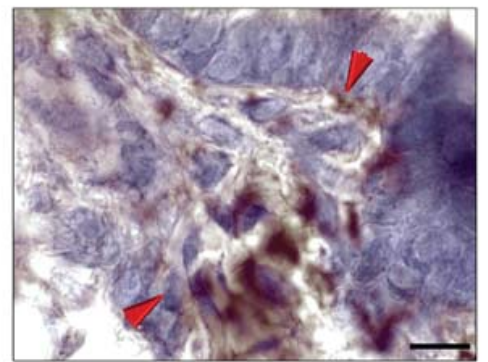

Day 14

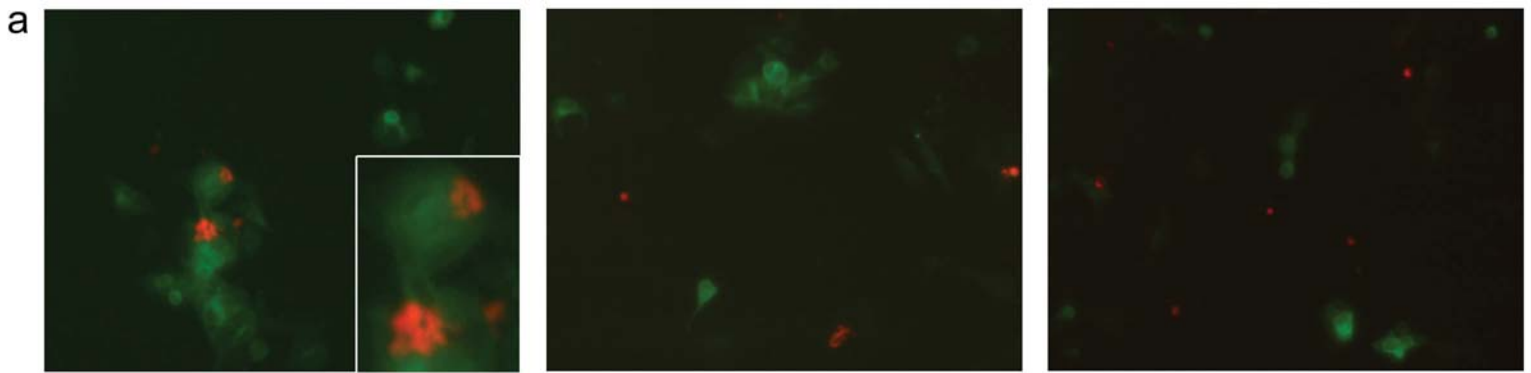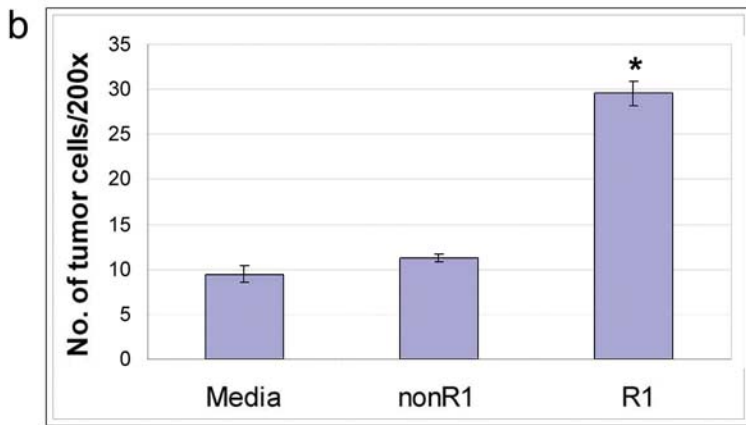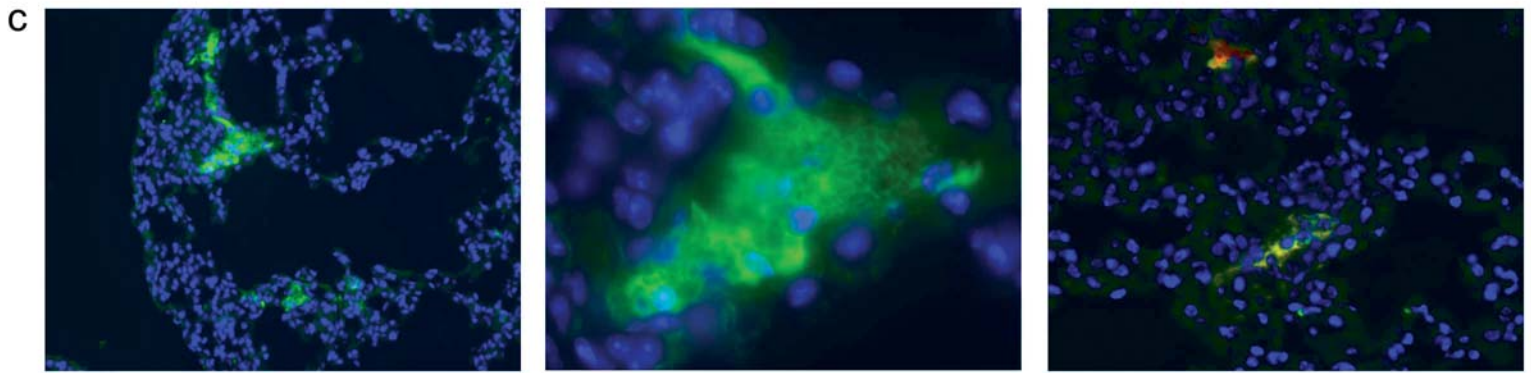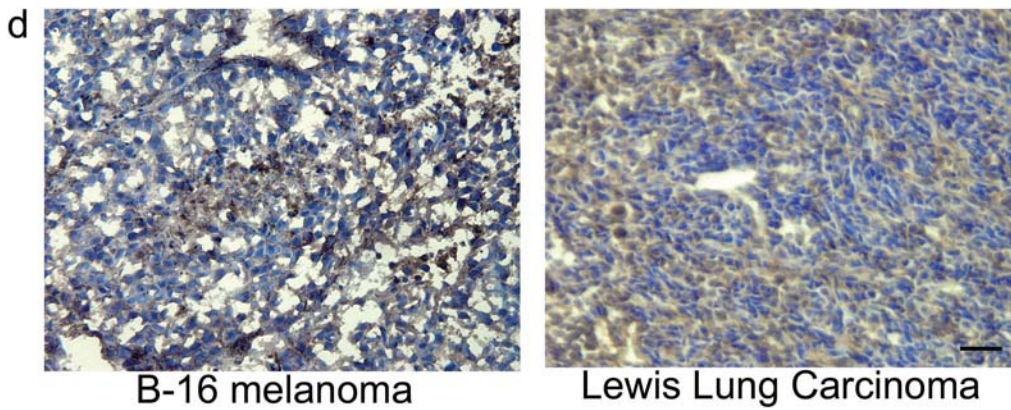

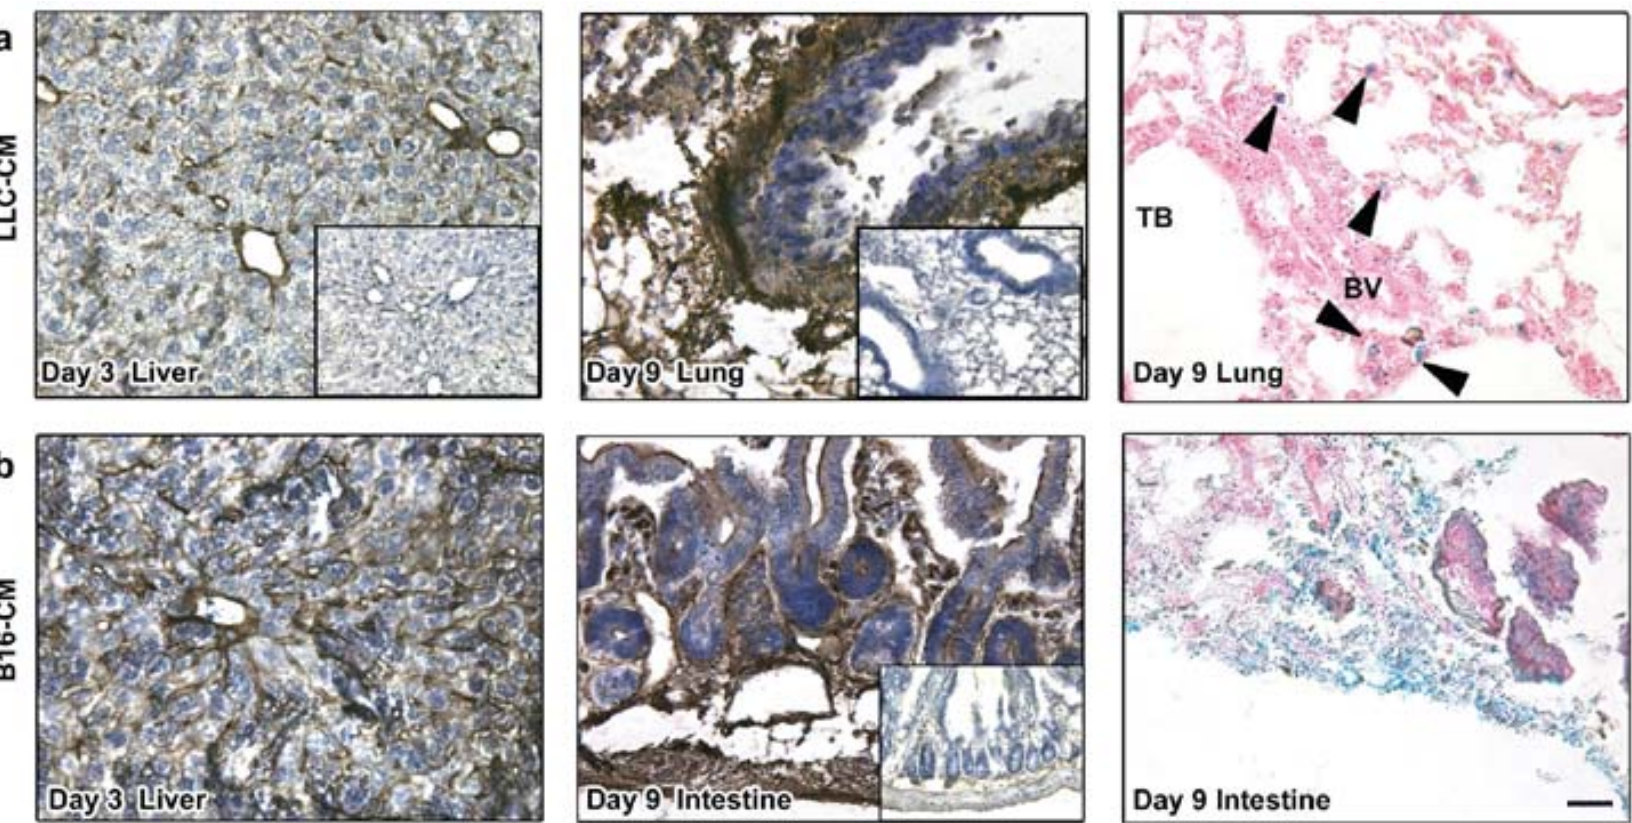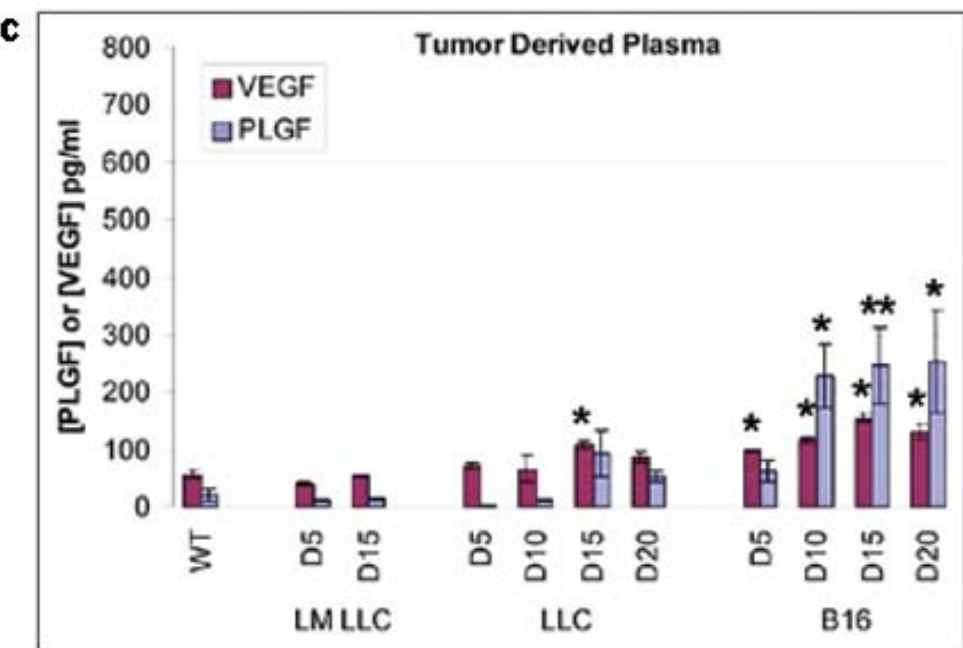

Supplement: NIHMS236203-supplement-01.pdf [file NIHMS236203-supplement-01.pdf]
