# Supplementary material
Source: PubMed Central journal article supplement (PMC2945882)

## Id3 KO mice lack HPC mobilization

|                 | WT with Tumor | Id3 KO with Tumor |
|-----------------|---------------|-------------------|
| CD11b+R1+ cells |               |                   |
| Day 7           | 3283.2        | 654.0             |
| Day 14          | 3364.2        | 614.3             |

Numbers represent CD11b+R1+ cells/ $\mu$ L obtained from peripheral blood of C57 WT and Id1<sup>+/-</sup>Id3<sup>-/-</sup> mice with LLC intradermal tumours, analyzed via flow cytometry.

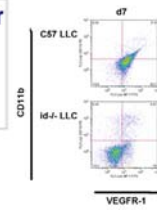

Supplement: NIHMS236203-supplement-Suppl_Table.pdf [file NIHMS236203-supplement-Suppl_Table.pdf]
